# Supplementary material for: Connection of large amplitude angular jump motions with temporal heterogeneity in aqueous solutions
Source: Royal Society of Chemistry journal article supplement (doi:10.1039/d0cp00491j), 2020-01-01
Supplement: d0cp00491j1.pdf [file d0cp00491j1.pdf]

*Supporting Information for*

# Large Amplitude Angular Jump Motions Connect Temporal Heterogeneity in Aqueous Solutions

Debasish Das Mahanta<sup>\*</sup>, Rajib Kumar Mitra<sup>\*</sup>

Chemical, Biological and Macromolecular Sciences  
S. N. Bose National Centre for Basic Sciences  
Block-JD, Sector-III, Salt Lake, Kolkata, 700106, India  
Phone: 91-33-23355706, Fax: +91-33-23353477

<sup>\*</sup> Email: [snbdebasish@gmail.com](mailto:snbdebasish@gmail.com) (DDM), [rajib@bose.res.in](mailto:rajib@bose.res.in) (RKM)

### Functional form of force field for DME

We used the unified atom models for DME molecules. The interaction potential energy function ( $V$ ) among the molecules is in general represented as follows,

$$V(r_1, r_2, r_3, \dots, r_n) = \sum_{bond} \frac{1}{2} K_b (b - b_0)^2 + \sum_{angles} \frac{1}{2} K_\theta (\theta - \theta_0)^2 + \sum_{dihedral} K_\phi [1 + \cos(n\phi - \delta)] + \sum_{i > j} \sum_{j > i} \dots \quad (S1)$$

The above equation (equation S1) consists of two types of interactions, bonded and non-bonded interactions. The first four terms in the equation represent the bonded interactions and the last two terms represent the non-bonded interactions.  $K_b$  is the bond force constant associated with the equilibrium bond distance ( $b_0$ ),  $K_\theta$  is the angle force constant with the equilibrium angle ( $\theta_0$ ).  $K_\phi$  is the dihedral constant with periodicity  $n$ , dihedral angle  $\phi$  and phase shift  $\delta$ .  $r_{ij}$  is the distance between the  $i$ -th and the  $j$ -th atoms with partial charges  $q_i$  and  $q_j$ , respectively.  $A = 4\epsilon\sigma_{ij}^{12}$  and  $B = 4\epsilon\sigma_{ij}^6$  are the Lennard-Jones constant with  $\epsilon$  is the depth of the potential well, and  $\sigma$  is the distance where the potential vanishes to zero. Further details about the force parameters are given in the table S1.

### Radial distribution function

To compute the spatial distributions of the atoms of the molecules as a function of distance ( $r$ ) in all those binary mixtures, we compute the radial distribution functions (RDF) of various possible pairs of oxygen following the equation as given below,

$$RDF_{ij}(r) = \left\langle \sum_{ij} \delta(r - r_{ij}) \right\rangle \quad (S2)$$

where  $r_{ij}$  is the distance between any  $i$ -th and  $j$ -th oxygen atoms.

### Average Number of Rotational Jumps:

According to Poissonian probability distribution function,

$$P(N,t) = \frac{1}{N!} \left(\frac{t}{\tau}\right)^N e^{-\left(\frac{t}{\tau}\right)}$$

where N can take values as 0, 1, 2, 3,..... The average number of events in an interval t can be written as,

$$\langle N(t) \rangle = \sum_{N=0}^{\infty} N(t) P(N,t)$$

$$\langle N(t) \rangle = e^{-\left(\frac{t}{\tau}\right)} \left[ \left(\frac{t}{\tau}\right) + \frac{1}{2!} \left(\frac{t}{\tau}\right)^2 + \frac{1}{3!} \left(\frac{t}{\tau}\right)^3 + \dots \right]$$

$$\langle N(t) \rangle = e^{-\left(\frac{t}{\tau}\right)} (e^{\frac{t}{\tau}} - 1)$$

$$\langle N(t) \rangle = [1 - e^{-\left(\frac{t}{\tau}\right)}]$$

Neglecting the higher order terms of  $\left(\frac{t}{\tau}\right)$ ,

$$\langle N(t) \rangle = \frac{t}{\tau} \tag{S3}$$

This shows that the average number of events in a certain time interval is proportional to the time (increase linearly with t).

**Table S1.** DME force field parameters.

| <b>Lennadr-Jones parameters</b>  |                               |                                                   |                                                    |                               |                               |
|----------------------------------|-------------------------------|---------------------------------------------------|----------------------------------------------------|-------------------------------|-------------------------------|
| Atom types                       | $C_6$ (kJ mol <sup>-1</sup> ) | $C_{12}$ (kJ mol <sup>-1</sup> nm <sup>12</sup> ) | Charge (e)                                         | Mass (uma)                    |                               |
| C(H3)                            | $9.3547 \times 10^{-3}$       | $3.6075 \times 10^{-3}$                           | 0.225                                              | 15.035                        |                               |
| C(H2)                            | $5.9491 \times 10^{-3}$       | $1.7912 \times 10^{-3}$                           | 0.225                                              | 14.027                        |                               |
| O                                | $2.0751 \times 10^{-6}$       | $1.5127 \times 10^{-3}$                           | -0.450                                             | 15.999                        |                               |
| <b>Modified atom pairs</b>       |                               |                                                   |                                                    |                               |                               |
| Atom pair type                   | $C_6$ (kJ mol <sup>-1</sup> ) |                                                   | $C_{12}$ (kJ mol <sup>-1</sup> nm <sup>12</sup> )  |                               |                               |
| O <sub>DME</sub> -O <sub>W</sub> | $0.6082 \times 10^{-2}$       |                                                   | $0.5475 \times 10^{-5}$                            |                               |                               |
| <b>Bonds Distance (in nm)</b>    |                               |                                                   |                                                    |                               |                               |
| C-C                              |                               |                                                   | C-O                                                |                               |                               |
| 0.153                            |                               |                                                   | 0.141                                              |                               |                               |
| <b>Bond angles</b>               |                               |                                                   |                                                    |                               |                               |
| Angles                           | $\Phi$ (deg)                  |                                                   | $K_\Phi$ (kJ mol <sup>-1</sup> rad <sup>-2</sup> ) |                               |                               |
| C-C-O                            | 109.5                         |                                                   | 418.68                                             |                               |                               |
| C-O-C                            | 109.5                         |                                                   | 501..22                                            |                               |                               |
| <b>Proper dihedrals</b>          |                               |                                                   |                                                    |                               |                               |
| Dihedrals                        | $C_0$ (kJ mol <sup>-1</sup> ) | $C_1$ (kJ mol <sup>-1</sup> )                     | $C_2$ (kJ mol <sup>-1</sup> )                      | $C_3$ (kJ mol <sup>-1</sup> ) | $C_4$ (kJ mol <sup>-1</sup> ) |
| O-C-C-O                          | -3.10                         | -0.74                                             | -4.69                                              | -6.87                         | 15.4                          |
| C-O-C-C                          | 1.12                          | -3.51                                             | -2.54                                              | 0.03                          | 4.90                          |

**Table S2.** Composition of the simulation box at different  $X_w$ .

| $X_w$ | Water | DME  |
|-------|-------|------|
| 0.06  | 800   | 50   |
| 0.25  | 600   | 200  |
| 0.45  | 500   | 393  |
| 0.60  | 200   | 300  |
| 0.70  | 200   | 500  |
| 0.85  | 200   | 1133 |
| 0.90  | 100   | 900  |

**Table S3.** Waiting time of the jump events (as calculated from the linear fit of n. vs t) at different  $X_w$ .

| $X_w$ | Waiting time (ps) |
|-------|-------------------|
| 0.06  | 2.89              |
| 0.25  | 3.68              |
| 0.45  | 3.91              |
| 0.60  | 4.00              |
| 0.70  | 4.12              |
| 0.85  | 4.21              |
| 0.90  | 4.20              |

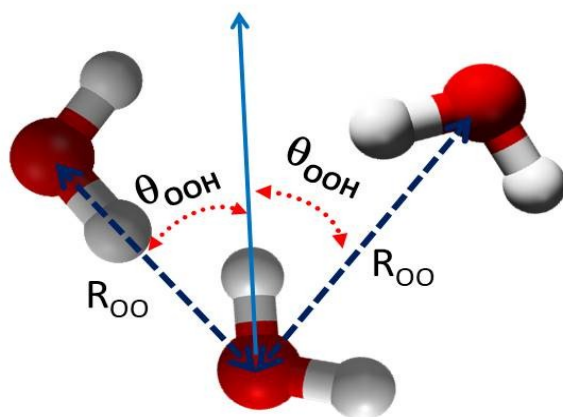

**Scheme S1.** Geometrical definition (both distance and angle criteria) of hydrogen bond among water molecules.

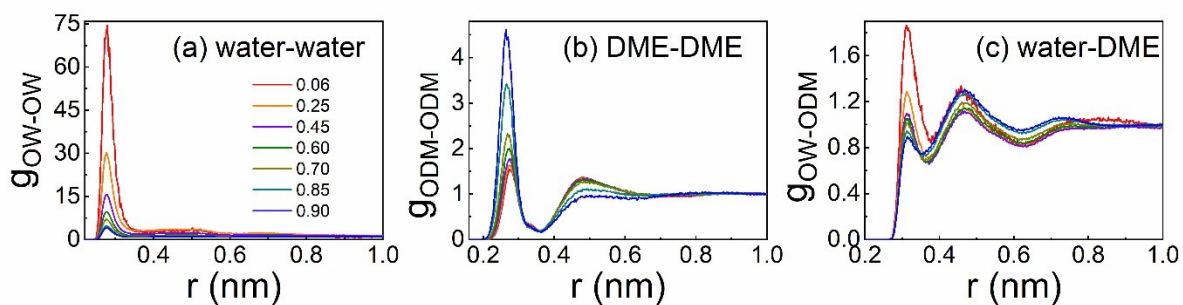

**Figure S1.** Radial distribution functions (RDF) in between (a) water oxygen-oxygen atoms (OW-OW), (b) DME oxygen-oxygen atoms (ODM-ODM) and (c) water oxygen-DME oxygen atoms (OW-ODM) for all the mixtures.

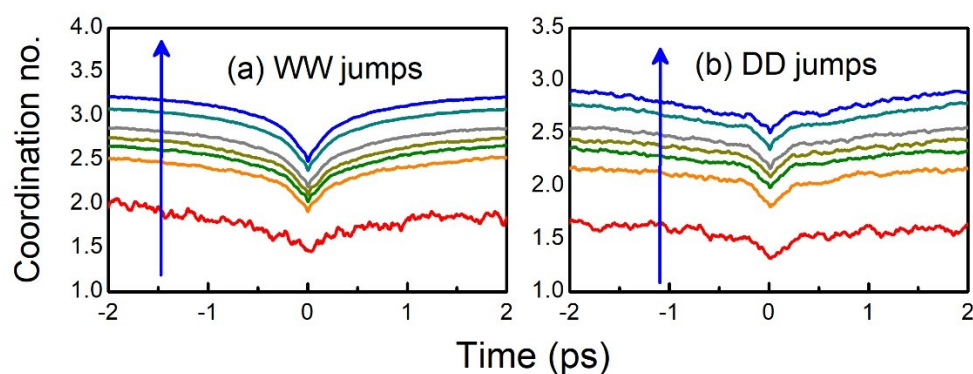

**Figure S2.** Coordination number of the rotating water molecule average over (a) water-water jumps and (b) DME-DME jumps. Arrow indicates the increasing of water concentration.

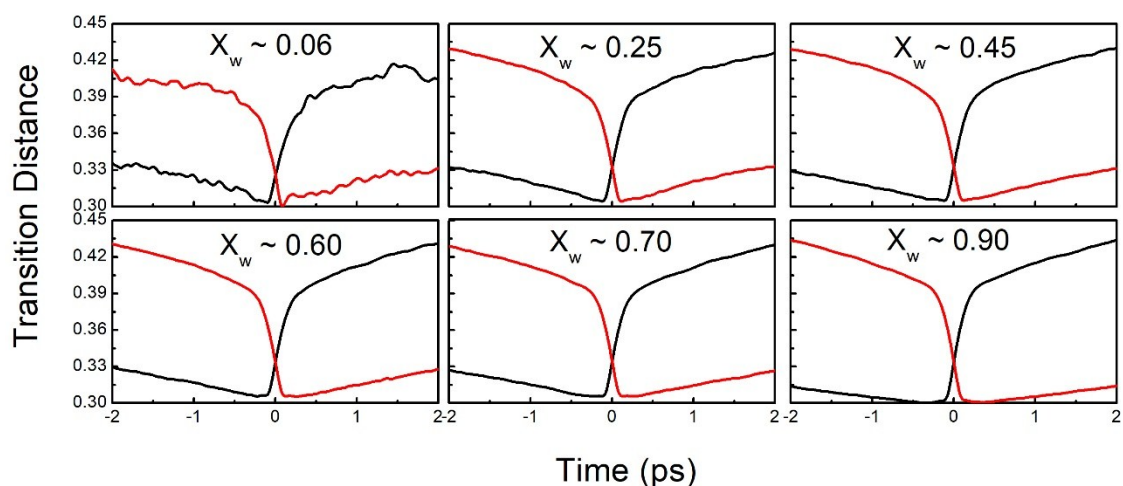

**Figure S3.** Average transition distance (average over only water-water jump events) from the central rotating water molecule to the initial (black lines) and the final (red lines) H-bond partner at the instant of H-bond switch (transition state;  $t=0$ ) at various  $X_w$ .

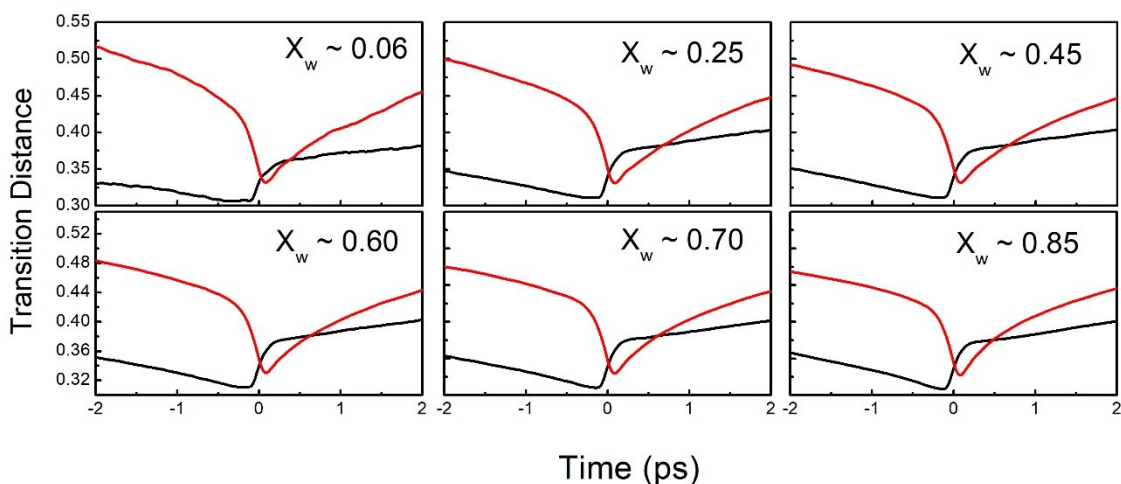

**Figure S4.** Progress of the average transition distance (average over only water-DME jump events) from the central rotating water molecule to the initial (black lines) and the final (red lines) H-bond partner around H-bond switching (transition state;  $t=0$ ) at various  $X_w$ .

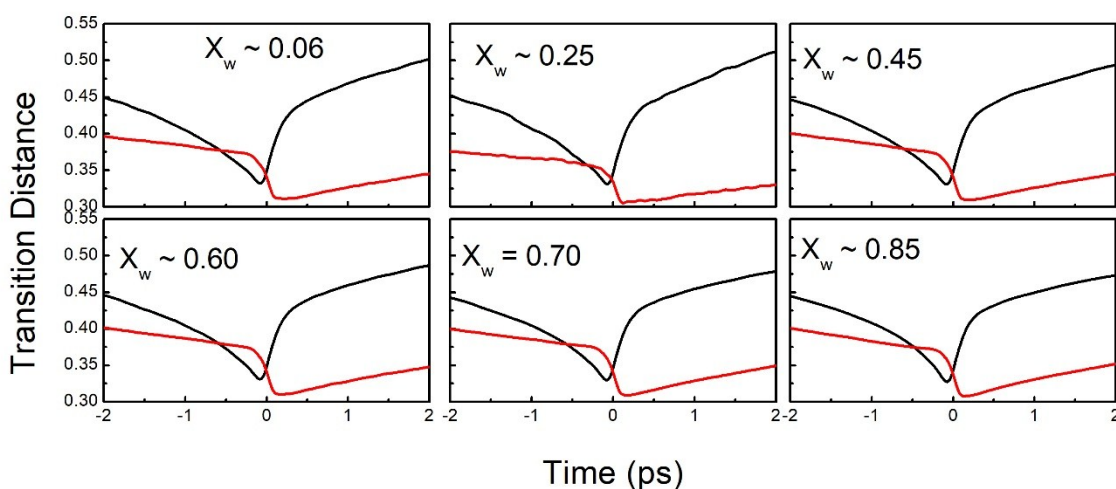

**Figure S5.** Progress of the average transition distance (average over only DME-water jump events) from the central rotating water molecule to the initial (black lines) and the final (red lines) H-bond partner around H-bond switch event (transition state;  $t=0$ ) at various  $X_w$ .



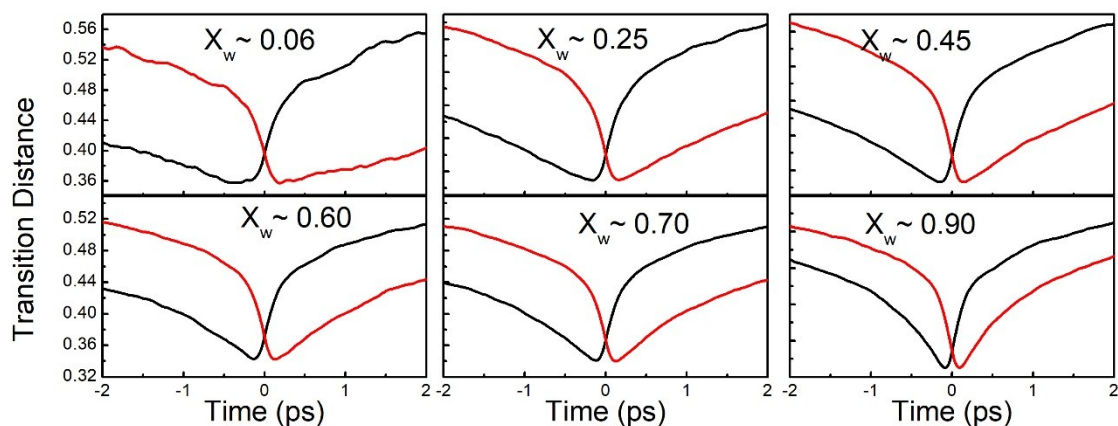

**Figure S6.** Progress of the average transition distance (average over only DME-DME jump events) from the central rotating water molecule to the initial (black lines) and the final (red lines) H-bond partner around H-bond jump (transition state;  $t=0$ ) at various  $X_w$ .

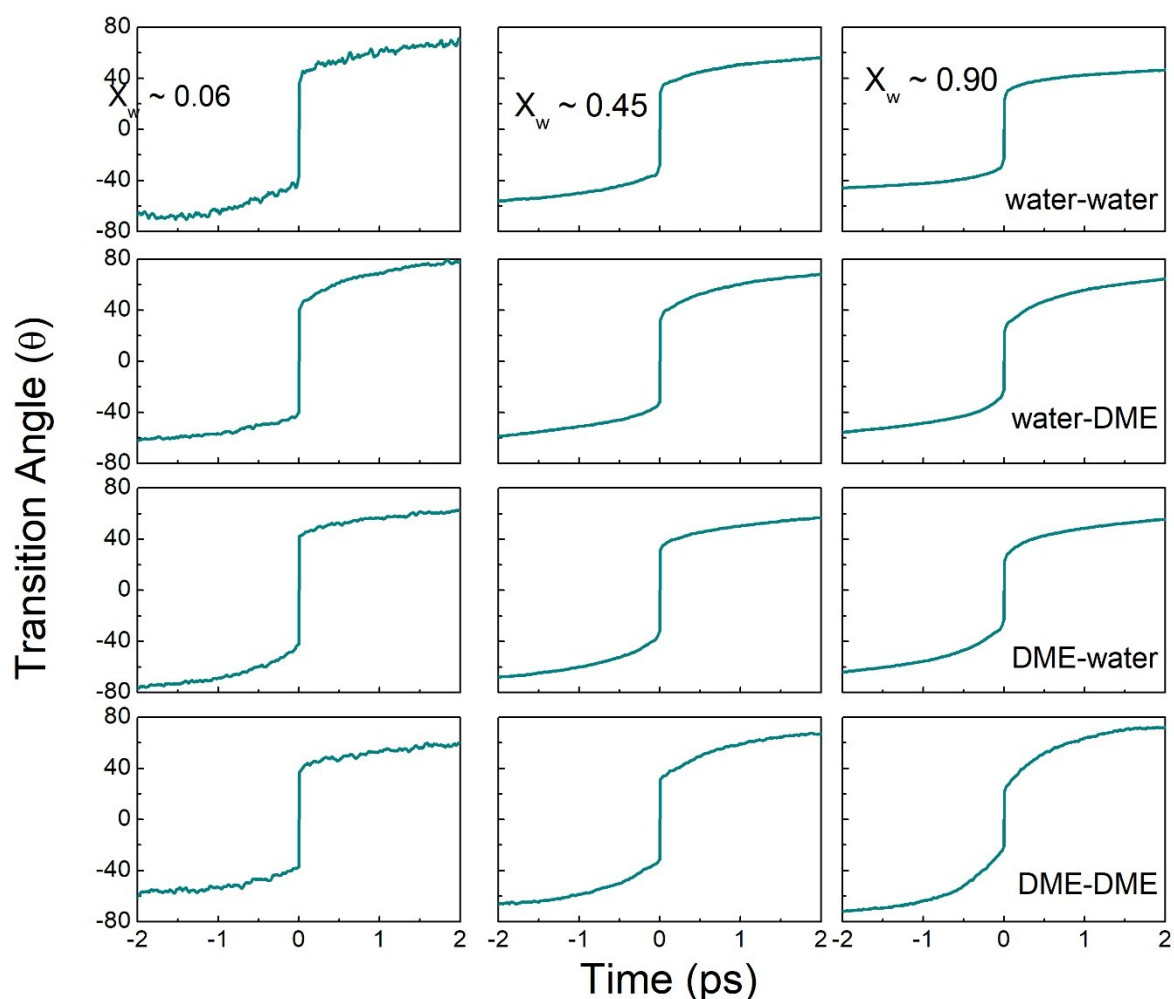

**Figure S7.** Time evolution of the average transition angle for various individual types of H-bond partner exchange events for three different  $X_w$ .

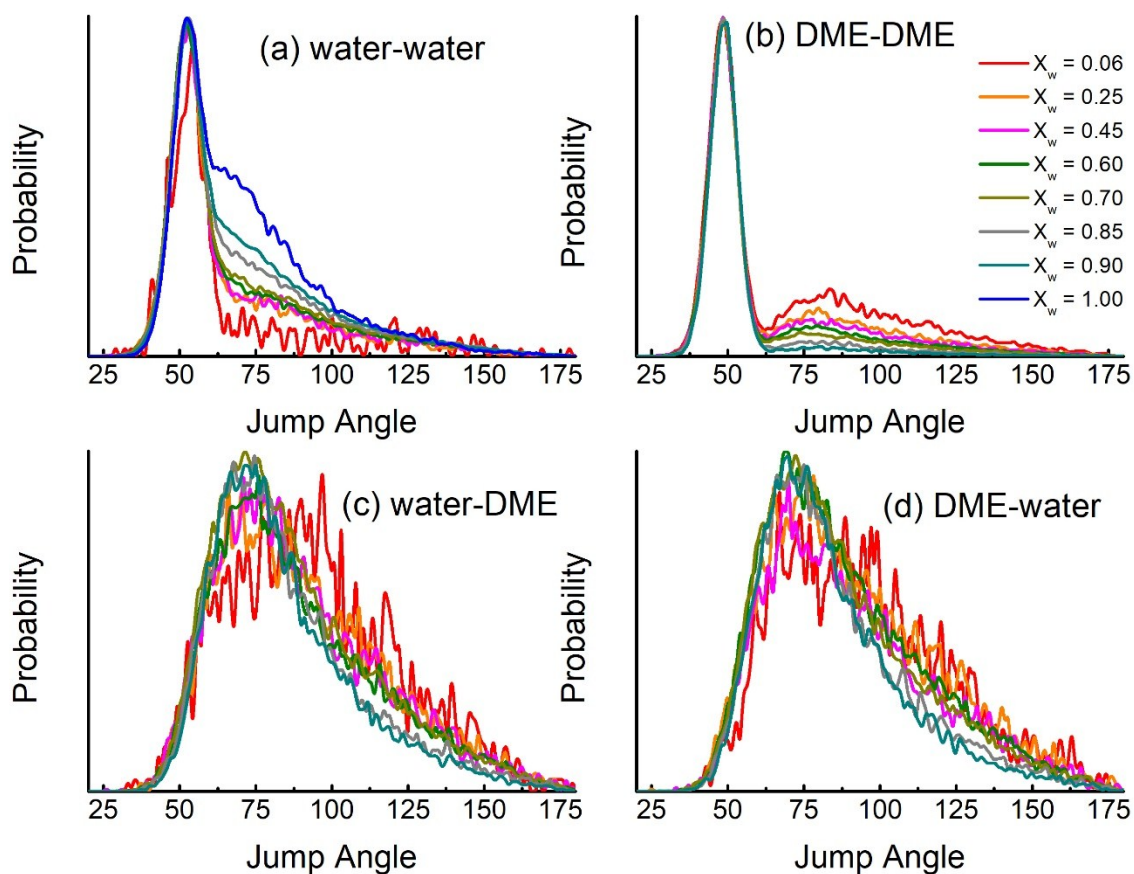

**Figure S8.** The jump angle distributions of any rotating central water molecule for various type of jump events (a) water-water, (b) DME-DME, (c) water-DME and (d) DME-water at each simulated concentrations.
